# Supplementary material for: Atomistic Insights into Silicate Dissolution of Metakaolinite under Alkaline Conditions: Ab Initio Quantum Mechanical Investigation
Source: PubMed Central journal article supplement — Langmuir. 2024 Sep 5;40(37):19332–42. doi: 10.1021/acs.langmuir.4c00890 (PMC11411703; doi:10.1021/acs.langmuir.4c00890), 2024-09-05
Supplement: la4c00890_si_001.pdf [file la4c00890_si_001.pdf]

# Supporting Information

## **Atomistic Insights into Silicate Dissolution of Metakaolinite under Alkaline Conditions: Ab Initio Quantum Mechanical Investigation**

Mohammadreza Izadifar<sup>1,\*</sup>, Neven Ukrainczyk<sup>1,\*</sup>, Eduardus Koenders<sup>1</sup>

*<sup>1</sup>Institute of Construction and Building Materials, Technical University of Darmstadt, Franziska-  
Braun-Str. 3, 64287 Darmstadt, Germany*

*Corresponding authors: [izadifar@wib.tu-darmstadt.de](mailto:izadifar@wib.tu-darmstadt.de), [ukrainczyk@wib.tu-darmstadt.de](mailto:ukrainczyk@wib.tu-darmstadt.de)*

## Table of Contents

### Tables

**Table S1:** Energy barrier ( $\Delta E_a$ ), and the energy change of reaction enthalpy ( $\Delta H$ ) computations with contribution of vdW interaction for models (1-4), hydrolysed by NaOH activator.

**Table S2:** Energy barrier ( $\Delta E_a$ ), and the energy change of reaction enthalpy ( $\Delta H$ ) computations without contribution of vdW interaction for models (1-4), hydrolysed by NaOH activator.

**Table S3:** Energy barrier ( $\Delta E_a$ ), and the energy change of reaction enthalpy ( $\Delta H$ ) computations with contribution of vdW interaction for models (1-4), hydrolysed by KOH activator.

**Table S4:** Energy barrier ( $\Delta E_a$ ), and the energy change of reaction enthalpy ( $\Delta H$ ) computations without contribution of vdW interaction for models (1-4), hydrolysed by KOH activator.

**Table S5:** Energy barrier ( $\Delta E_a$ ), and the energy change of reaction enthalpy ( $\Delta H$ ) computations with contribution of vdW interaction for models (1-4), hydrolysed by H<sub>2</sub>O activator.

### Figures

**Figure S1:** Minimum energy path for computation of energy barrier, along with the associated energy change in reaction enthalpy ( $\Delta H$ ) without contribution of vdW interaction for models (1-4) with NaOH absorbents.

**Figure S2:** Minimum energy path for computation of energy barrier, along with the associated energy change in reaction enthalpy ( $\Delta H$ ) without contribution of vdW interaction for models (1-4) with KOH absorbents.

| <b>Models</b> | $\Delta E_a$<br>(eV) | $\Delta E_a$<br>(kJ/mol) | $E_{\text{reactant}}$<br>(eV) | $E_{\text{transition state}}$<br>(eV) | $E_{\text{product}}$<br>(eV) | $\Delta H$<br>(eV) | $\Delta H$<br>(kJ/mol) |
|---------------|----------------------|--------------------------|-------------------------------|---------------------------------------|------------------------------|--------------------|------------------------|
| (1)           | 1.13                 | 109.03                   | -176.47                       | -175.34                               | -177.84                      | -1.37              | -132.18                |
| (2)           | 2.06                 | 198.76                   | -178.18                       | -176.12                               | -177.46                      | 0.72               | 69.47                  |
| (3)           | 1.18                 | 113.85                   | -191.61                       | -190.43                               | -191.54                      | 0.07               | 6.75                   |
| (4)           | 2.38                 | 229.63                   | -189.71                       | -187.33                               | -191.54                      | -1.83              | -176.56                |

**Table S1.** Results for four presented models with contribution of vdW interaction, hydrolysed by NaOH activator: energy barrier (activation energy) for hydrolysis reaction ( $\Delta E_a = E_{\text{transition state}} - E_{\text{reactant}}$ ), the energy change of reaction enthalpy ( $\Delta H = E_{\text{product}} - E_{\text{reactant}}$ ) obtained from first-principles based calculations.

| <b>Models</b> | $\Delta E_a$<br>(eV) | $\Delta E_a$<br>(kJ/mol) | $E_{\text{reactant}}$<br>(eV) | $E_{\text{transition state}}$<br>(eV) | $E_{\text{product}}$<br>(eV) | $\Delta H$<br>(eV) | $\Delta H$<br>(kJ/mol) |
|---------------|----------------------|--------------------------|-------------------------------|---------------------------------------|------------------------------|--------------------|------------------------|
| (1)           | 1.35                 | 130.25                   | -175.88                       | -174.53                               | -176.94                      | -1.06              | -102.27                |
| (2)           | 2.08                 | 200.69                   | -177.46                       | -175.38                               | -176.71                      | 0.75               | 72.36                  |
| (3)           | 1.18                 | 113.85                   | -190.65                       | -189.47                               | -190.70                      | -0.05              | 4.82                   |
| (4)           | 2.44                 | 235.42                   | -188.81                       | -186.37                               | -190.70                      | -1.89              | -182.36                |

**Table S2.** Results for four presented models without contribution of vdW interaction, hydrolysed by NaOH activator: energy barrier (activation energy) for hydrolysis reaction ( $\Delta E_a = E_{\text{transition state}} - E_{\text{reactant}}$ ), the energy change of reaction enthalpy ( $\Delta H = E_{\text{product}} - E_{\text{reactant}}$ ) obtained from first-principles based calculations.

| <b>Models</b> | $\Delta E_a$<br>(eV) | $\Delta E_a$<br>(kJ/mol) | $E_{\text{reactant}}$<br>(eV) | $E_{\text{transition state}}$<br>(eV) | $E_{\text{product}}$<br>(eV) | $\Delta H$<br>(eV) | $\Delta H$<br>(kJ/mol) |
|---------------|----------------------|--------------------------|-------------------------------|---------------------------------------|------------------------------|--------------------|------------------------|
| (1)           | 1.04                 | 100.34                   | -176.63                       | -175.59                               | -178.17                      | -1.54              | -148.58                |
| (2)           | 1.76                 | 169.81                   | -178.12                       | -176.36                               | -177.46                      | 0.66               | 63.68                  |
| (3)           | 1.26                 | 121.57                   | -192.20                       | -190.94                               | -191.25                      | 0.95               | 91.66                  |
| (4)           | 2.15                 | 207.44                   | -190.15                       | -188.00                               | -191.25                      | -1.10              | -106.13                |

**Table S3.** Results for four presented models with contribution of vdW interaction, hydrolysed by KOH activator: energy barrier (activation energy) for hydrolysis reaction ( $\Delta E_a = E_{\text{transition state}} - E_{\text{reactant}}$ ), the energy change of reaction enthalpy ( $\Delta H = E_{\text{product}} - E_{\text{reactant}}$ ) obtained from first-principles based calculations.

| <b>Models</b> | $\Delta E_a$<br>(eV) | $\Delta E_a$<br>(kJ/mol) | $E_{\text{reactant}}$<br>(eV) | $E_{\text{transition state}}$<br>(eV) | $E_{\text{product}}$<br>(eV) | $\Delta H$<br>(eV) | $\Delta H$<br>(kJ/mol) |
|---------------|----------------------|--------------------------|-------------------------------|---------------------------------------|------------------------------|--------------------|------------------------|
| <b>(1)</b>    | 1.06                 | 102.27                   | -175.83                       | -174.77                               | -177.32                      | -1.49              | -143.76                |
| <b>(2)</b>    | 1.80                 | 173.67                   | -177.40                       | -175.60                               | -176.70                      | 0.70               | 67.54                  |
| <b>(3)</b>    | 1.18                 | 113.85                   | -191.11                       | -189.93                               | -190.24                      | 0.87               | 83.94                  |
| <b>(4)</b>    | 2.2                  | 212.27                   | -189.23                       | -187.03                               | -190.24                      | -1.01              | -97.45                 |

**Table S4.** Results for four presented models without contribution of vdW interaction, hydrolysed by KOH activator: energy barrier (activation energy) for hydrolysis reaction ( $\Delta E_a = E_{\text{transition state}} - E_{\text{reactant}}$ ), the energy change of reaction enthalpy ( $\Delta H = E_{\text{product}} - E_{\text{reactant}}$ ) obtained from first-principles based calculations.

| <b>Models</b> | $\Delta E_a$<br>(eV) | $\Delta E_a$<br>(kJ/mol) | $E_{\text{reactant}}$<br>(eV) | $E_{\text{transition state}}$<br>(eV) | $E_{\text{product}}$<br>(eV) | $\Delta H$<br>(eV) | $\Delta H$<br>(kJ/mol) |
|---------------|----------------------|--------------------------|-------------------------------|---------------------------------------|------------------------------|--------------------|------------------------|
| <b>(1)</b>    | 1.67                 | 161.13                   | -178.87                       | -177.20                               | -178.68                      | 0.19               | 18.33                  |
| <b>(2)</b>    | 0.88                 | 84.90                    | -178.58                       | -177.70                               | -178.71                      | -0.13              | -12.54                 |
| <b>(3)</b>    | 1.62                 | 156.30                   | -193.42                       | -191.80                               | -193.20                      | 0.22               | 21.22                  |
| <b>(4)</b>    | 0.71                 | 68.50                    | -193.62                       | -192.91                               | -193.20                      | 0.42               | 40.52                  |

**Table S5.** Results for four presented models with contribution of vdW interaction, hydrolysed by H<sub>2</sub>O activator: energy barrier (activation energy) for hydrolysis reaction ( $\Delta E_a = E_{\text{transition state}} - E_{\text{reactant}}$ ), the energy change of reaction enthalpy ( $\Delta H = E_{\text{product}} - E_{\text{reactant}}$ ) obtained from first-principles based calculations.

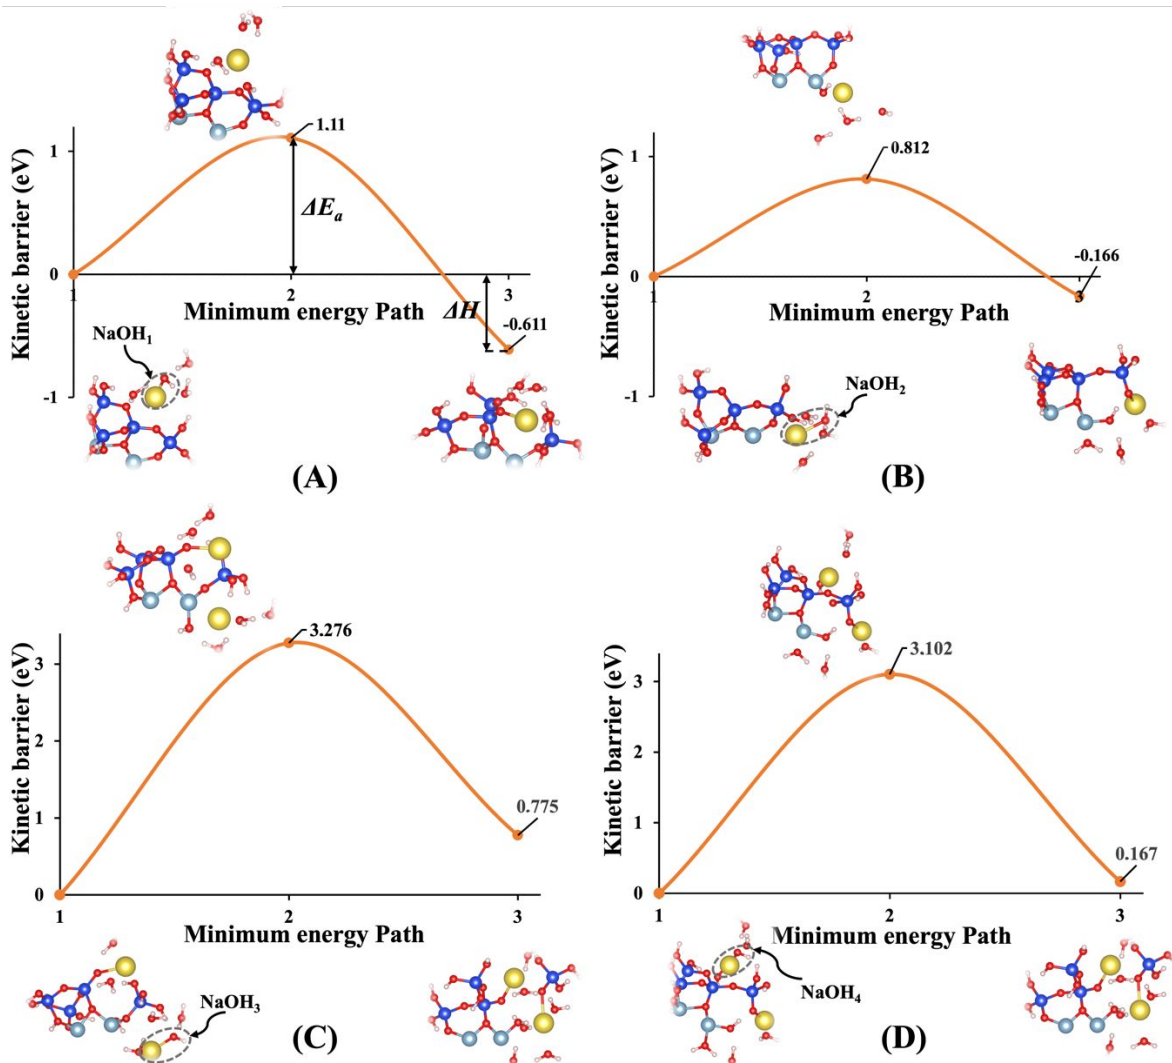

**Figure S1.** (A-D) Minimum energy path for computation of energy barrier (activation energy) of hydrolysis reaction ( $\Delta E_a$ ), along with the associated energy change in reaction enthalpy ( $\Delta H$ ) including (NaOH)<sub>1-4</sub> absorbents surrounded by hydration shell without contribution of vdW interaction as presented for four models (1-4), respectively.

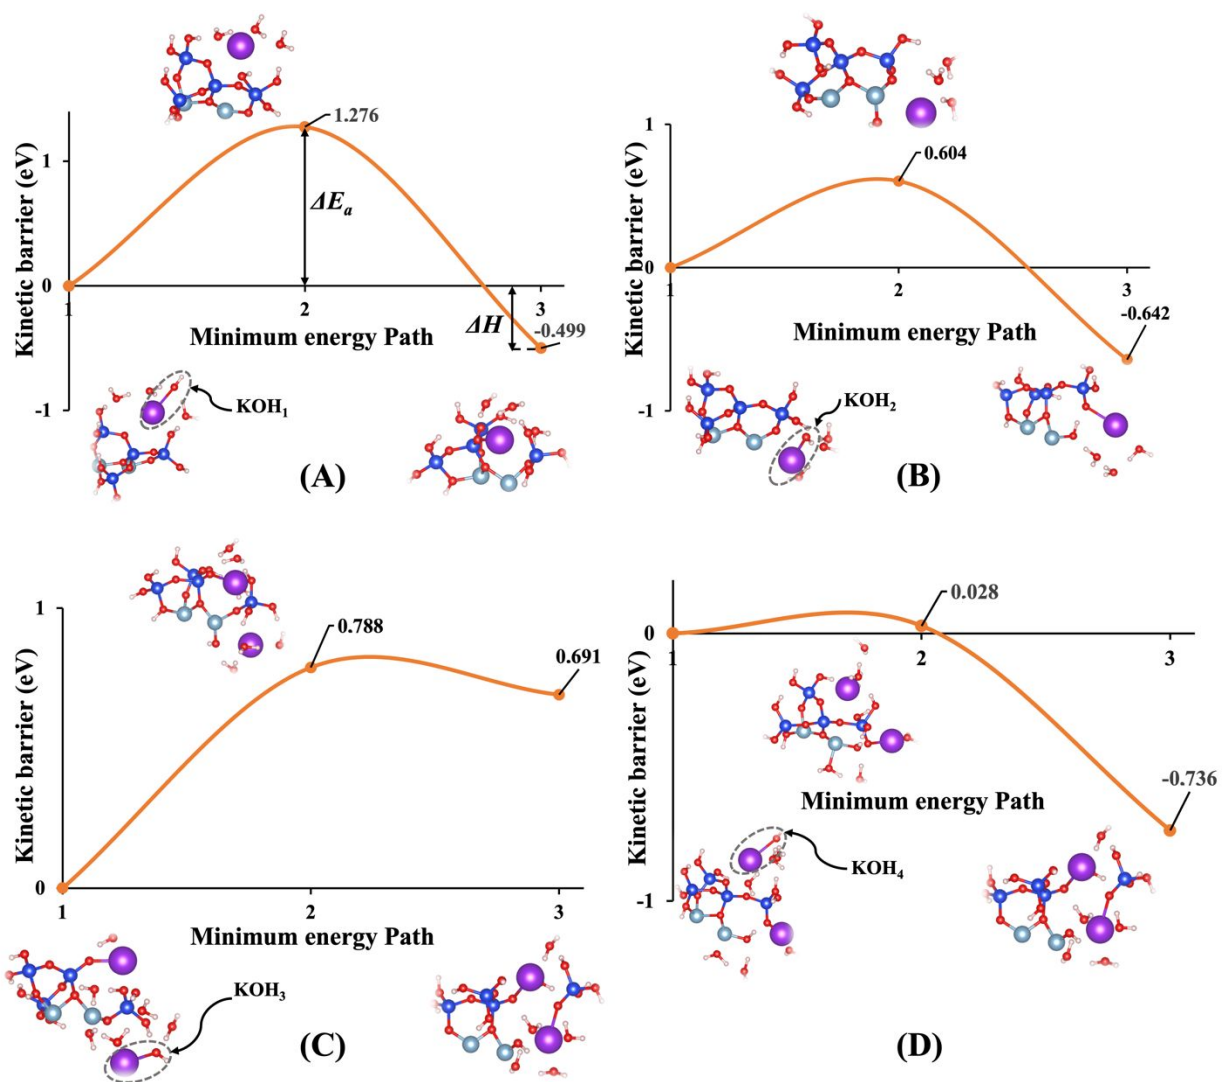

**Figure S2.** (A-D) Minimum energy path for computation of energy barrier (activation energy) of hydrolysis reaction ( $\Delta E_a$ ), along with the associated energy change in reaction enthalpy ( $\Delta H$ ) including  $(\text{KOH})_{1-4}$  absorbents surrounded by hydration shell without contribution of vdW interaction as presented for four models (1-4), respectively.
